# Supplementary material
Source: publisher figshare collection journal article supplement (https://frontiersin.figshare.com/ndownloader/files/14689787)
Supplement: Supplementary file [file 14689787]

## **(1) Collection and summary of descriptive data using PE tools (4 themes)**

**Planned: 25 CI, 5 stakeholders, (250 participants)**

**Actual: 26 CI, 5 stakeholders, (198 participants)**

- (a) Characterise diseases in poultry farms, and describe farmers' strategies to prevent and control them
- (b) Identify the timing of AMU in relation to the amounts used
- (c) Identify sources of advice and procurement of antimicrobials to farmers
- (d) Identify opinions about positive and negative aspects of AMU

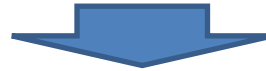

## **(2) Generation of statements**

**46 statements, 4 thematic areas**

- (a) Farmers' reliance on antimicrobials to prevent and treat disease
- (b) Logistics of AMU in the field
- (c) Costs of antimicrobials
- (d) Impact of AMU on animal productivity and AMR.

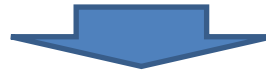

## **(3) Participant selection**

**(60 participants)**

Maximise diversity (based on type of production, gender, age, experience, level of education)

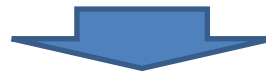

## **(4) Individual interviews for Q-sorting**

**(60 participants)**

Ranking of statements according to level of agreement/disagreement

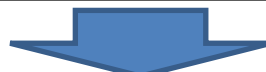

## **(5) Q-sorting analysis**

**(54 participants, 28 farmers and 26 advisors)**

Exclude individuals providing incomplete data (6 participants)
